# Supplementary material
Source: Copernicus journal article supplement (doi:10.5194/egusphere-2026-3087)
Supplement: Supplementary file 1 [file egusphere-2026-3087-supplement.pdf]

## Support information

### Revealing the Mechanistic Linkage Between QBO-Modulated Stratospheric Dynamics and Southern Tibetan Plateau Precipitation by Stratospheric $^{10}\text{Be}/^7\text{Be}$ Isotope Characteristics

Xuke Liu<sup>1,3#</sup>, Nanjian Liu<sup>5,6,#</sup>, Yunchong Fu<sup>1,3,4\*</sup>, Guocheng Dong<sup>1,3</sup>, Li Zhang<sup>1,3</sup>, Xinyi Du<sup>1,6</sup>, Yanting Bi<sup>2</sup>

1. State Key Laboratory of Loess Science, Institute of Earth Environment, Chinese Academy of Sciences, Xi'an, 710061, China
2. Xi'an Institute for Innovative Earth Environment Research, Xi'an, 710061, China
3. Shaanxi Key Laboratory of Accelerator Mass Spectrometry Technology and Application, Xi'an AMS Center of IEECAS, Xi'an 710061, China
4. Institute of Global Environmental Change, Xi'an Jiaotong University, Xi'an, 710049, China
5. Institute of Geographic Sciences and Natural Resources Research, Chinese Academy of Sciences, Beijing, 100101, China
6. University of Chinese Academy of Sciences, Beijing, 100049, China

#The authors contribution equally to this work and should be considered co-first authors

\*Corresponding author: Yunchong Fu, E-mail: fuyc@ieecas.cn

#### Supporting figures:

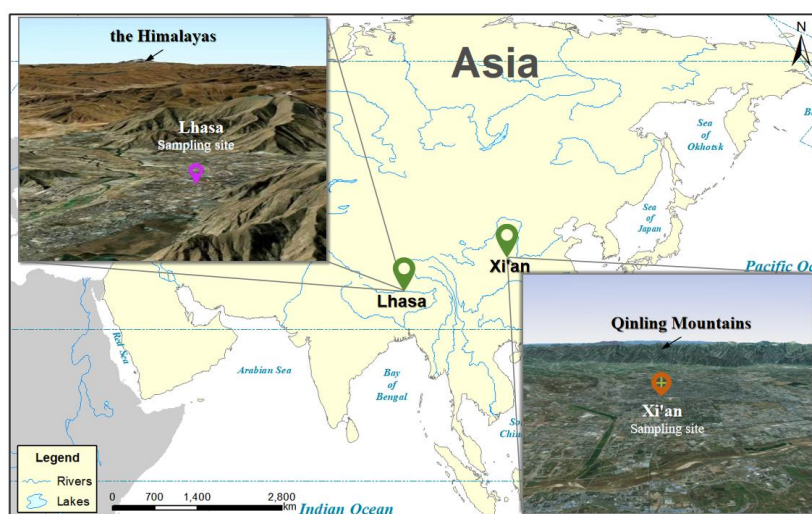

Fig. S1 Geographical environment of each sampling point. Maps data: © Google Earth 2025, images: © Esri, HERE, Garmin, FAO, NOAA, USGS | Powered by Esri.

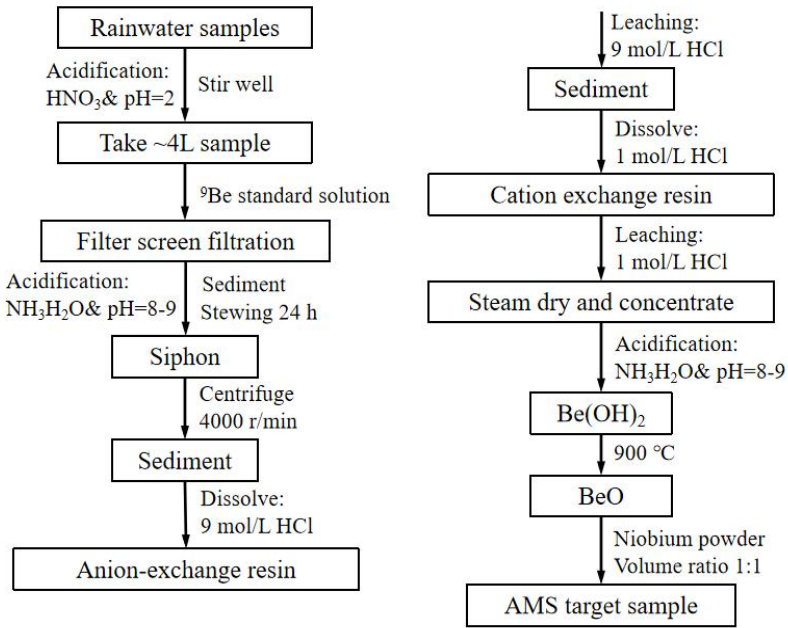

Fig.S2 Extraction and purification scheme of beryllium in rainwater samples

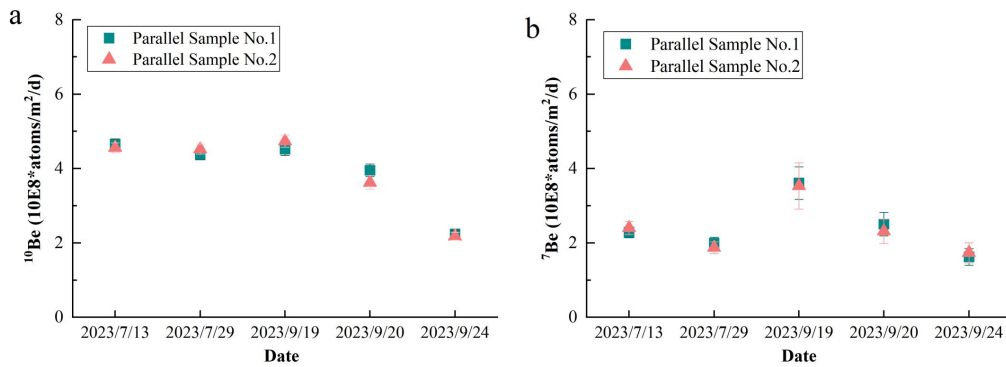

Fig.S3 Parallel test results of rainwater samples.  $^{10}\text{Be}$  (a),  $^7\text{Be}$  (b)

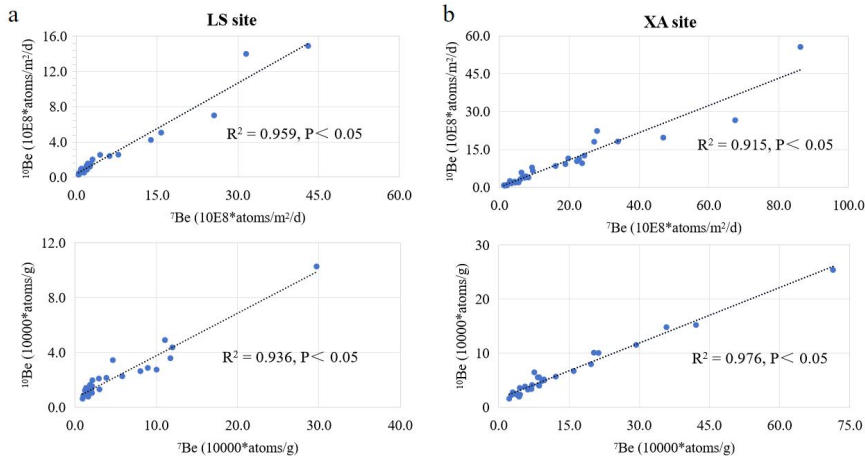

Fig.S4 Correlation between the fluxes and concentrations of  $^7\text{Be}$  and  $^{10}\text{Be}$  in precipitation in Lhasa (a) and Xi'an (b)

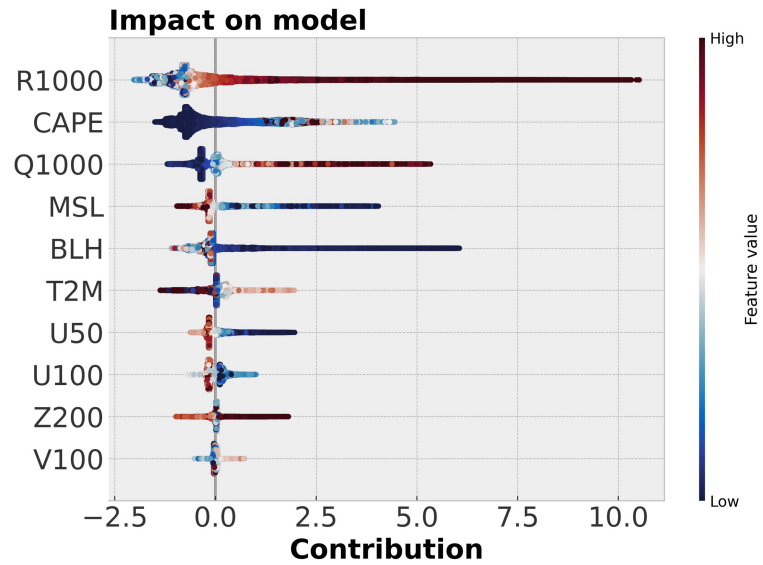

Fig.S5 Drivers and contribution of total precipitation revealed by machine learning. The contribution is expressed in SHapley Additive exPlanations (SHAP) value, which measure the impact of each driver factor induced by meteorological conditions change on the model output. R1000, relative humidity at 1000hPa (%); CAPE, convectively available potential energy (J/kg); Q1000, specific humidity at 1000hPa (g/kg); MSL, mean sea level pressure (hPa); BLH (m); T2M, air temperature at 2 meters (K); U50, zonal wind at 50hPa (m/s); U100, zonal wind at 100 meters (m/s); Z200, geopotential height at 200hPa (m); V200, meridional wind at 100 meters (m/s).

**Supporting tables:**

Table S1. Measurement results of atmospheric  $^7\text{Be}$  and  $^{10}\text{Be}$  concentration and flux, as well as  $^{10}\text{Be}/^7\text{Be}$  ratio in rainfall at Lhasa station

| Time      | Rain collection | $^{10}\text{Be}$ concentration | Error | $^7\text{Be}$ concentration | Error | $^{10}\text{Be}/^7\text{Be}$ | Error | Daily rainfall | $^{10}\text{Be}$ flux                 | Error | $^7\text{Be}$ flux                    | Error |
|-----------|-----------------|--------------------------------|-------|-----------------------------|-------|------------------------------|-------|----------------|---------------------------------------|-------|---------------------------------------|-------|
|           | volume<br>(L)   | ( $10^4$ atoms·g $^{-1}$ )     |       | ( $10^4$ atoms·g $^{-1}$ )  |       |                              |       | mm             | ( $10^8$ atoms·m $^{-2}$ ·d $^{-1}$ ) |       | ( $10^8$ atoms·m $^{-2}$ ·d $^{-1}$ ) |       |
| 2022/7/21 | 4               | 2.117                          | 0.133 | 1.541                       | 0.416 | 1.373                        | 0.361 | 10.1           | 1.557                                 | 0.420 | 1.387                                 | 0.364 |
| 2022/7/26 | 6               | 2.945                          | 0.173 | 2.101                       | 0.340 | 1.402                        | 0.211 | 1.4            | 0.294                                 | 0.048 | 0.196                                 | 0.030 |
| 2022/8/3  | 6               | 1.525                          | 0.087 | 0.878                       | 0.348 | 1.737                        | 0.683 | 29             | 2.545                                 | 1.010 | 5.039                                 | 1.980 |
| 2022/8/19 | 6               | 1.784                          | 0.125 | 1.050                       | 0.365 | 1.698                        | 0.578 | 8.3            | 0.872                                 | 0.303 | 1.410                                 | 0.480 |
| 2022/8/31 | 4               | 1.598                          | 0.140 | 1.074                       | 0.427 | 1.488                        | 0.577 | 18.8           | 2.019                                 | 0.803 | 2.797                                 | 1.085 |
| 2022/9/3  | 5               | 1.713                          | 0.139 | 1.179                       | 0.416 | 1.453                        | 0.498 | 11             | 1.297                                 | 0.457 | 1.598                                 | 0.548 |
| 2022/9/4  | 4.25            | 1.037                          | 0.104 | 0.865                       | 0.349 | 1.200                        | 0.469 | 6.5            | 0.562                                 | 0.227 | 0.780                                 | 0.305 |
| 2022/9/7  | 5               | 1.379                          | 0.071 | 1.165                       | 0.156 | 1.183                        | 0.146 | 6.1            | 0.711                                 | 0.095 | 0.722                                 | 0.089 |
| 2022/9/8  | 5.95            | 1.857                          | 0.151 | 1.644                       | 0.316 | 1.129                        | 0.196 | 2.8            | 0.460                                 | 0.088 | 0.316                                 | 0.055 |
| 2022/9/12 | 5.2             | 1.225                          | 0.161 | 1.237                       | 0.599 | 0.990                        | 0.461 | 7.9            | 0.977                                 | 0.473 | 0.782                                 | 0.365 |
| 2022/9/13 | 4.5             | 0.944                          | 0.084 | 0.633                       | 0.317 | 1.490                        | 0.734 | 5              | 0.317                                 | 0.158 | 0.745                                 | 0.367 |
| 2022/9/14 | 4.5             | 1.376                          | 0.115 | 1.422                       | 0.404 | 0.967                        | 0.263 | 6.2            | 0.882                                 | 0.251 | 0.600                                 | 0.163 |
| 2022/9/25 | 4.5             | 1.756                          | 0.155 | 1.014                       | 0.361 | 1.732                        | 0.597 | 15.3           | 1.551                                 | 0.552 | 2.650                                 | 0.914 |
| 2022/9/27 | 4.5             | 1.365                          | 0.138 | 1.051                       | 0.365 | 1.298                        | 0.431 | 7.4            | 0.778                                 | 0.270 | 0.961                                 | 0.319 |
| 2022/9/29 | 4.5             | 2.150                          | 0.122 | 1.981                       | 0.366 | 1.085                        | 0.191 | 2.2            | 0.436                                 | 0.081 | 0.239                                 | 0.042 |
| 2023/6/13 | 4               | 29.703                         | 0.439 | 10.291                      | 0.215 | 2.886                        | 0.043 | 14.5           | 14.922                                | 0.312 | 4.185                                 | 0.062 |
| 2023/6/14 | 4               | 11.068                         | 0.332 | 4.916                       | 0.209 | 2.251                        | 0.068 | 28.5           | 14.011                                | 0.594 | 6.416                                 | 0.192 |
| 2023/6/15 | 12              | 4.659                          | 0.154 | 3.452                       | 0.162 | 1.350                        | 0.045 | 2.5            | 0.863                                 | 0.040 | 0.337                                 | 0.011 |
| 2023/6/16 | 12              | 11.981                         | 0.202 | 4.377                       | 0.104 | 2.737                        | 0.046 | 1.2            | 0.525                                 | 0.013 | 0.328                                 | 0.006 |

|           |     |        |       |       |       |       |       |      |       |       |       |       |
|-----------|-----|--------|-------|-------|-------|-------|-------|------|-------|-------|-------|-------|
| 2023/6/19 | 4.5 | 3.868  | 0.185 | 2.155 | 0.278 | 1.795 | 0.215 | 2.7  | 0.582 | 0.075 | 0.485 | 0.058 |
| 2023/6/20 | 6   | 10.036 | 0.271 | 2.755 | 0.254 | 3.643 | 0.321 | 25.5 | 7.025 | 0.648 | 9.290 | 0.819 |
| 2023/6/21 | 7   | 11.738 | 0.293 | 3.590 | 0.264 | 3.270 | 0.226 | 11.8 | 4.236 | 0.312 | 3.858 | 0.267 |
| 2023/7/3  | 6   | 8.957  | 0.251 | 2.880 | 0.302 | 3.110 | 0.314 | 17.6 | 5.069 | 0.531 | 5.473 | 0.552 |
| 2023/7/24 | 5.5 | 3.013  | 0.141 | 1.319 | 0.280 | 2.285 | 0.474 | 6.5  | 0.857 | 0.182 | 1.485 | 0.308 |
| 2023/8/3  | 5.5 | 2.095  | 0.145 | 1.053 | 0.236 | 1.990 | 0.425 | 9.2  | 0.969 | 0.217 | 1.830 | 0.391 |
| 2023/8/4  | 5.5 | 1.635  | 0.122 | 0.781 | 0.123 | 2.094 | 0.291 | 15.5 | 1.210 | 0.191 | 3.245 | 0.451 |
| 2023/8/7  | 6   | 5.819  | 0.153 | 2.272 | 0.369 | 2.562 | 0.411 | 10.6 | 2.408 | 0.391 | 2.715 | 0.436 |
| 2023/8/8  | 5   | 8.049  | 0.205 | 2.646 | 0.410 | 3.042 | 0.465 | 9.7  | 2.566 | 0.398 | 2.951 | 0.451 |
| 2023/8/25 | 10  | 2.022  | 0.103 | 1.333 | 0.177 | 1.517 | 0.185 | 10.5 | 1.400 | 0.185 | 1.593 | 0.195 |

Table S2. Measurement results of atmospheric  $^7\text{Be}$  and  $^{10}\text{Be}$  concentration and flux, as well as  $^{10}\text{Be}/^7\text{Be}$  ratio in rainfall at Xi'an station

| Time      | Rain collection |                                |       | $^{10}\text{Be}$ concentration |       |                              |       | $^7\text{Be}$ concentration |                                       |       |                                       | Daily rainfall |                |                                       |       | $^{10}\text{Be}$ flux                 |       |  |  | $^7\text{Be}$ flux |  |  |  |
|-----------|-----------------|--------------------------------|-------|--------------------------------|-------|------------------------------|-------|-----------------------------|---------------------------------------|-------|---------------------------------------|----------------|----------------|---------------------------------------|-------|---------------------------------------|-------|--|--|--------------------|--|--|--|
|           | volume          | $^{10}\text{Be}$ concentration | Error | $^7\text{Be}$ concentration    | Error | $^{10}\text{Be}/^7\text{Be}$ | Error | Daily rainfall              | $^{10}\text{Be}$ flux                 | Error | $^7\text{Be}$ flux                    | Error          | Daily rainfall | $^{10}\text{Be}$ flux                 | Error | $^7\text{Be}$ flux                    | Error |  |  |                    |  |  |  |
|           | (L)             | ( $10^4$ atoms·g $^{-1}$ )     |       | ( $10^4$ atoms·g $^{-1}$ )     |       |                              |       | mm                          | ( $10^8$ atoms·m $^{-2}$ ·d $^{-1}$ ) |       | ( $10^8$ atoms·m $^{-2}$ ·d $^{-1}$ ) |                | mm             | ( $10^8$ atoms·m $^{-2}$ ·d $^{-1}$ ) |       | ( $10^8$ atoms·m $^{-2}$ ·d $^{-1}$ ) |       |  |  |                    |  |  |  |
| 2023/4/2  | 40              | 3.655                          | 0.189 | 2.456                          | 0.452 | 1.488                        | 0.263 | 3.5                         | 0.860                                 | 0.158 | 0.521                                 | 0.092          |                |                                       |       |                                       |       |  |  |                    |  |  |  |
| 2023/4/19 | 27              | 5.627                          | 0.324 | 3.874                          | 0.664 | 1.453                        | 0.234 | 17                          | 6.586                                 | 1.129 | 2.469                                 | 0.399          |                |                                       |       |                                       |       |  |  |                    |  |  |  |
| 2023/4/20 | 17              | 9.297                          | 0.220 | 4.910                          | 0.377 | 1.894                        | 0.138 | 17.3                        | 8.494                                 | 0.651 | 3.276                                 | 0.239          |                |                                       |       |                                       |       |  |  |                    |  |  |  |
| 2023/4/21 | 4.5             | 20.340                         | 0.382 | 10.130                         | 0.674 | 2.008                        | 0.128 | 11.2                        | 11.346                                | 0.755 | 2.249                                 | 0.143          |                |                                       |       |                                       |       |  |  |                    |  |  |  |
| 2023/5/5  | 53              | 8.522                          | 0.225 | 4.163                          | 0.437 | 2.047                        | 0.208 | 2.5                         | 1.041                                 | 0.109 | 0.512                                 | 0.052          |                |                                       |       |                                       |       |  |  |                    |  |  |  |
| 2023/5/6  | 10              | 16.019                         | 0.305 | 6.724                          | 0.526 | 2.382                        | 0.181 | 29.3                        | 19.701                                | 1.541 | 6.980                                 | 0.530          |                |                                       |       |                                       |       |  |  |                    |  |  |  |
| 2023/5/9  | 5               | 6.219                          | 0.313 | 3.294                          | 0.404 | 1.888                        | 0.211 | 7                           | 2.306                                 | 0.283 | 1.321                                 | 0.148          |                |                                       |       |                                       |       |  |  |                    |  |  |  |
| 2023/5/20 | 30              | 29.363                         | 0.407 | 11.566                         | 0.533 | 2.539                        | 0.112 | 23                          | 26.602                                | 1.227 | 5.839                                 | 0.257          |                |                                       |       |                                       |       |  |  |                    |  |  |  |
| 2023/5/21 | 5               | 71.394                         | 0.634 | 25.434                         | 0.786 | 2.807                        | 0.083 | 0.3                         | 0.763                                 | 0.024 | 0.084                                 | 0.002          |                |                                       |       |                                       |       |  |  |                    |  |  |  |
| 2023/5/25 | 8               | 35.826                         | 0.433 | 14.838                         | 0.552 | 2.415                        | 0.085 | 1.3                         | 1.929                                 | 0.072 | 0.314                                 | 0.011          |                |                                       |       |                                       |       |  |  |                    |  |  |  |

|           |     |        |       |        |       |       |       |      |        |       |        |       |
|-----------|-----|--------|-------|--------|-------|-------|-------|------|--------|-------|--------|-------|
| 2023/5/26 | 4.5 | 42.148 | 0.518 | 15.249 | 0.636 | 2.764 | 0.110 | 1.3  | 1.982  | 0.083 | 0.359  | 0.014 |
| 2023/5/27 | 48  | 8.665  | 0.212 | 4.029  | 0.350 | 2.151 | 0.179 | 4    | 1.612  | 0.140 | 0.860  | 0.072 |
| 2023/5/29 | 30  | 12.194 | 0.245 | 5.698  | 0.341 | 2.140 | 0.121 | 18.2 | 10.371 | 0.620 | 3.895  | 0.219 |
| 2023/5/31 | 18  | 9.738  | 0.212 | 5.039  | 0.302 | 1.932 | 0.108 | 25   | 12.599 | 0.755 | 4.831  | 0.270 |
| 2023/6/2  | 48  | 7.123  | 0.231 | 4.145  | 0.355 | 1.718 | 0.136 | 27.7 | 11.482 | 0.984 | 4.760  | 0.378 |
| 2023/6/3  | 60  | 8.352  | 0.244 | 5.559  | 0.417 | 1.502 | 0.104 | 32.5 | 18.066 | 1.354 | 4.883  | 0.337 |
| 2023/6/17 | 15  | 6.881  | 0.204 | 3.651  | 0.285 | 1.885 | 0.136 | 8.7  | 3.176  | 0.248 | 1.640  | 0.118 |
| 2023/6/27 | 5   | 19.734 | 0.385 | 7.998  | 0.310 | 2.467 | 0.083 | 12   | 9.597  | 0.372 | 2.961  | 0.099 |
| 2023/7/2  | 30  | 7.000  | 0.174 | 3.407  | 0.194 | 2.055 | 0.105 | 27   | 9.198  | 0.524 | 5.548  | 0.284 |
| 2023/7/13 | 58  | 8.648  | 0.183 | 5.576  | 0.308 | 1.551 | 0.079 | 99.7 | 55.595 | 3.075 | 15.463 | 0.790 |
| 2023/7/20 | 10  | 21.321 | 0.311 | 10.071 | 0.311 | 2.117 | 0.058 | 3.9  | 3.928  | 0.121 | 0.826  | 0.022 |
| 2023/7/28 | 48  | 4.560  | 0.128 | 2.404  | 0.175 | 1.897 | 0.128 | 16   | 3.846  | 0.280 | 3.035  | 0.204 |
| 2023/7/29 | 11  | 4.369  | 0.131 | 1.991  | 0.161 | 2.195 | 0.165 | 3.4  | 0.677  | 0.055 | 0.746  | 0.056 |
| 2023/8/5  | 28  | 9.670  | 0.190 | 5.179  | 0.255 | 1.867 | 0.084 | 35.1 | 18.179 | 0.894 | 6.554  | 0.296 |
| 2023/8/19 | 35  | 4.000  | 0.163 | 2.315  | 0.342 | 1.728 | 0.245 | 19   | 4.399  | 0.650 | 3.283  | 0.466 |
| 2023/8/26 | 120 | 2.720  | 0.133 | 2.298  | 0.425 | 1.183 | 0.211 | 34.3 | 7.883  | 1.458 | 4.059  | 0.724 |
| 2023/9/19 | 7.5 | 4.519  | 0.167 | 3.608  | 0.435 | 1.253 | 0.144 | 61.9 | 22.334 | 2.690 | 7.753  | 0.889 |
| 2023/9/20 | 5   | 3.952  | 0.167 | 2.504  | 0.316 | 1.578 | 0.188 | 16.8 | 4.206  | 0.531 | 2.651  | 0.315 |
| 2023/9/24 | 20  | 2.241  | 0.102 | 1.622  | 0.222 | 1.382 | 0.179 | 14.1 | 2.287  | 0.314 | 1.949  | 0.252 |
| 2023/10/3 | 80  | 3.006  | 0.114 | 2.804  | 0.257 | 1.072 | 0.089 | 21   | 5.888  | 0.539 | 2.251  | 0.187 |
| 2023/10/5 | 10  | 7.616  | 0.197 | 6.489  | 1.066 | 1.174 | 0.190 | 3.9  | 2.531  | 0.416 | 0.458  | 0.074 |
